# Supplementary material for: In vitro and in vivo efficacy of the novel oral proteasome inhibitor NNU546 in multiple myeloma
Source: Aging (Albany NY). 2020 Nov 16;12(22):22949–74. doi: 10.18632/aging.104023 (PMC7746380; doi:10.18632/aging.104023)
Supplement: Supplementary Figures [file aging-12-104023-s001..pdf]

## SUPPLEMENTARY TABLES

**Supplementary Table 1. The microsomal stabilities of the compounds.**

| Compound   | Human liver microsomes |                           | Rat liver microsomes |                           | Mouse liver microsomes |                           |
|------------|------------------------|---------------------------|----------------------|---------------------------|------------------------|---------------------------|
|            | $t_{1/2}$ (min)        | $CL_{int}$<br>(mL/min/kg) | $t_{1/2}$ (min)      | $CL_{int}$<br>(mL/min/kg) | $t_{1/2}$ (min)        | $CL_{int}$<br>(mL/min/kg) |
| Bortezomib | 21.4                   | 58.3                      | 12.4                 | 200.5                     | 10.7                   | 508.7                     |
| NNU219     | 32.4                   | 43                        | 27.8                 | 50                        | 16.7                   | 83                        |

Note: The microsomal stabilities of bortezomib and NNU219 were determined in the presence of pooled human, rat or mouse liver microsomes.  $T_{1/2}$  (min) and  $CL_{int}$  (mL/min/kg) were detected by LC/MS. Antipyrine and testosterone (5  $\mu$ M each) were used as positive and negative controls, respectively. Abbreviations: t = time;  $CL_{int}$ , intrinsic clearance.

**Supplementary Table 2. Pharmacokinetic profiles of NNU546 in mice.**

|      | $t_{1/2}$ (h) | CL (mL·h <sup>-1</sup> ·kg <sup>-1</sup> ) | V <sub>z</sub> (mL·kg <sup>-1</sup> ) | AUC <sub>0-t</sub> (h·ng·mL <sup>-1</sup> ) | MRT (h)    | F(%)      |
|------|---------------|--------------------------------------------|---------------------------------------|---------------------------------------------|------------|-----------|
| i.v. | 2.08±0.991    | 986±75.4                                   | 2914±1247                             | 1890±73.8                                   | 1.55±0.133 | ---       |
| i.g. | 2.41±0.420    | ---                                        | ---                                   | 208±26.7                                    | 2.35±0.221 | 11.0±1.41 |

Note: Blood samples were collected at baseline and after intravenous or oral administration of 2 mg/kg of NNU546. Each time-point represents the average value of three animals. NNU546 concentration in blood and plasma samples was determined by liquid chromatography-tandem mass spectrometry (LC/MS/MS) in a non-good laboratory practice lab. Pharmacokinetic analysis of the blood and plasma concentration data was performed using WinNonlin version 5.2 (Pharsight Corp.). Kinetic parameters were estimated using a noncompartmental model with sparse sampling mode (model 201 for plasma and blood). Area under the concentration vs. time curve (AUC) was calculated using the linear trapezoidal rule. Abbreviations: t = time; CL, clearance; V<sub>z</sub>, apparent volume of distribution; AUC<sub>0-t</sub>, AUC (area under the curve) from 0 to t h; MRT, mean residence time; F%, oral bioavailability.
