# Supplementary material for: In vitro and in vivo efficacy of the novel oral proteasome inhibitor NNU546 in multiple myeloma
Source: Aging (Albany NY). 2020 Nov 16;12(22):22949–74. doi: 10.18632/aging.104023 (PMC7746380; doi:10.18632/aging.104023)
Supplement: Supplementary Tables [file aging-12-104023-s002..pdf]

## SUPPLEMENTARY FIGURES

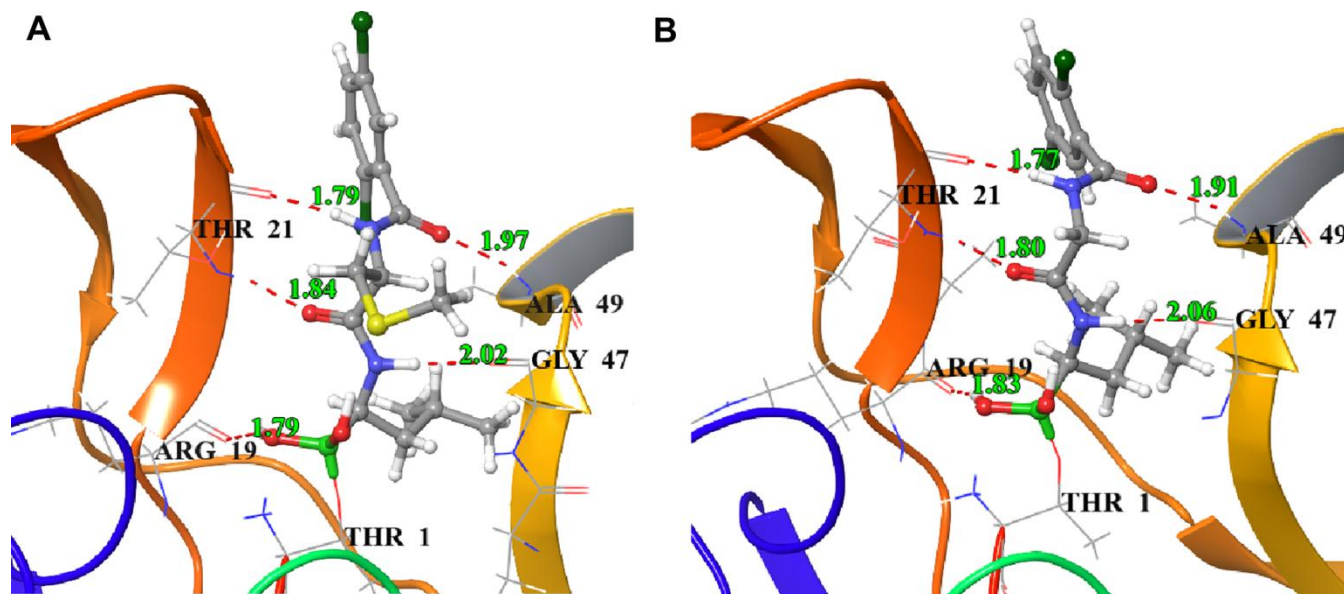

**Supplementary Figure 1. Covalent docking with  $\beta 5$  subunit.** (A) Binding mode of NNU219 with  $\beta 5$  subunit; (B) Binding mode of MLN2238 with  $\beta 5$  subunit. All the hydrogen atoms were not shown. The amino acid residues of  $\beta 5$  subunit were shown in ribbon models. NNU219 and MLN2238 were represented as ball and stick models. The pictures were rendered in PyMOL.

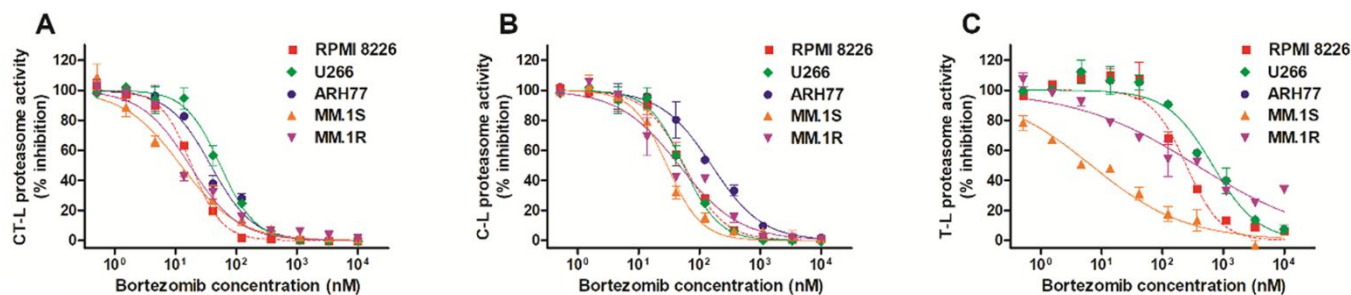

**Supplementary Figure 2. Proteasome active site selectivity of bortezomib in human MM cell lines.** MM cells were treated with various concentrations of bortezomib for 1 h and harvested and cytosolic extracts were then analyzed for CT-L (A), C-L (B) and T-L (C) proteasome activity. Results were represented as percent activity of proteasome in drug-treated cells vs. vehicle-treated cells ( $\pm$ SD).

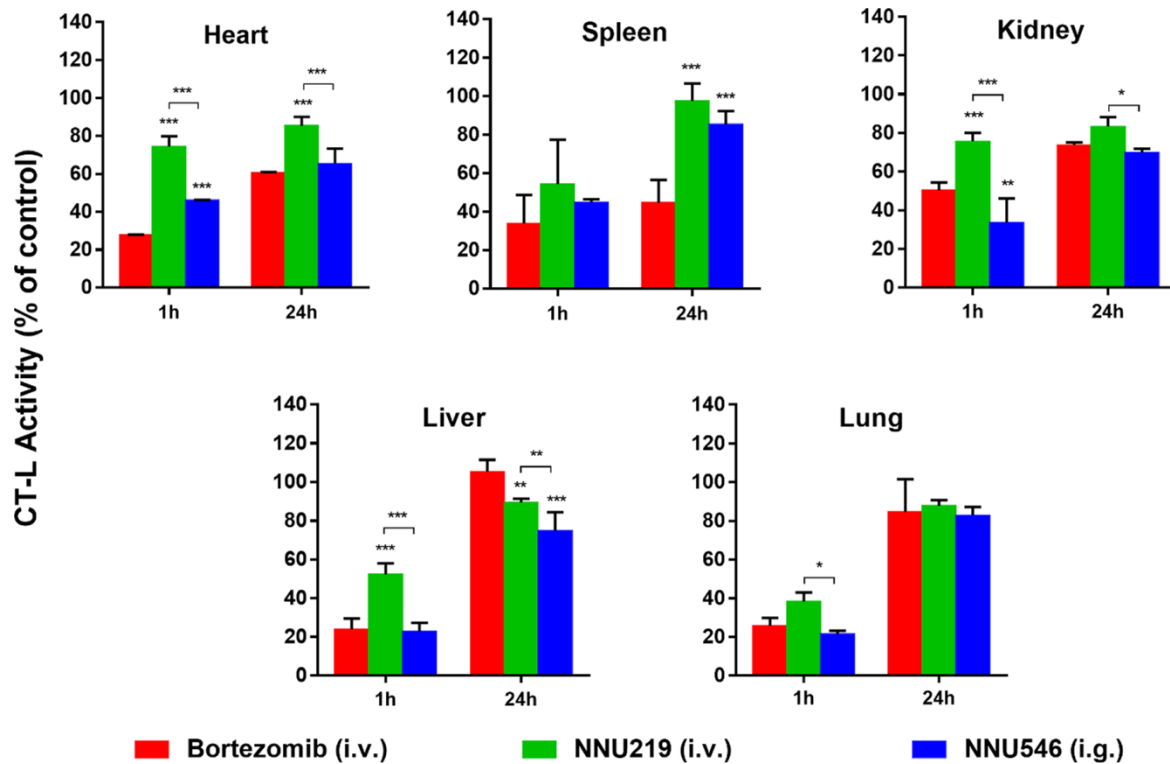

**Supplementary Figure 3. Pharmacodynamic profiles of proteasome inhibition in mice bearing human multiple myeloma xenografts.** ARH77 tumor-bearing mice were administered with a single dose of NNU219 (0.4 mg/kg, i.v.), NNU546 (2 mg/kg, i.g.) or bortezomib (1 mg/kg, i.v.) and were euthanized at 1 h and 24 h after administrations. Blood and normal tissues (spleen, kidney, liver, lung) were harvested and then protein extracts were prepared and the proteasome catalytic activity was evaluated with CT-L subunit-specific fluorescent peptide substrates. Data were presented as the mean  $\pm$ SD percent activity relative to vehicle controls (3 mice per time-point). *p* values presented for bortezomib vs NNU219 or NNU546 (\*,  $p < 0.05$ ; \*\*,  $p < 0.01$ ; \*\*\*,  $p < 0.001$ ).

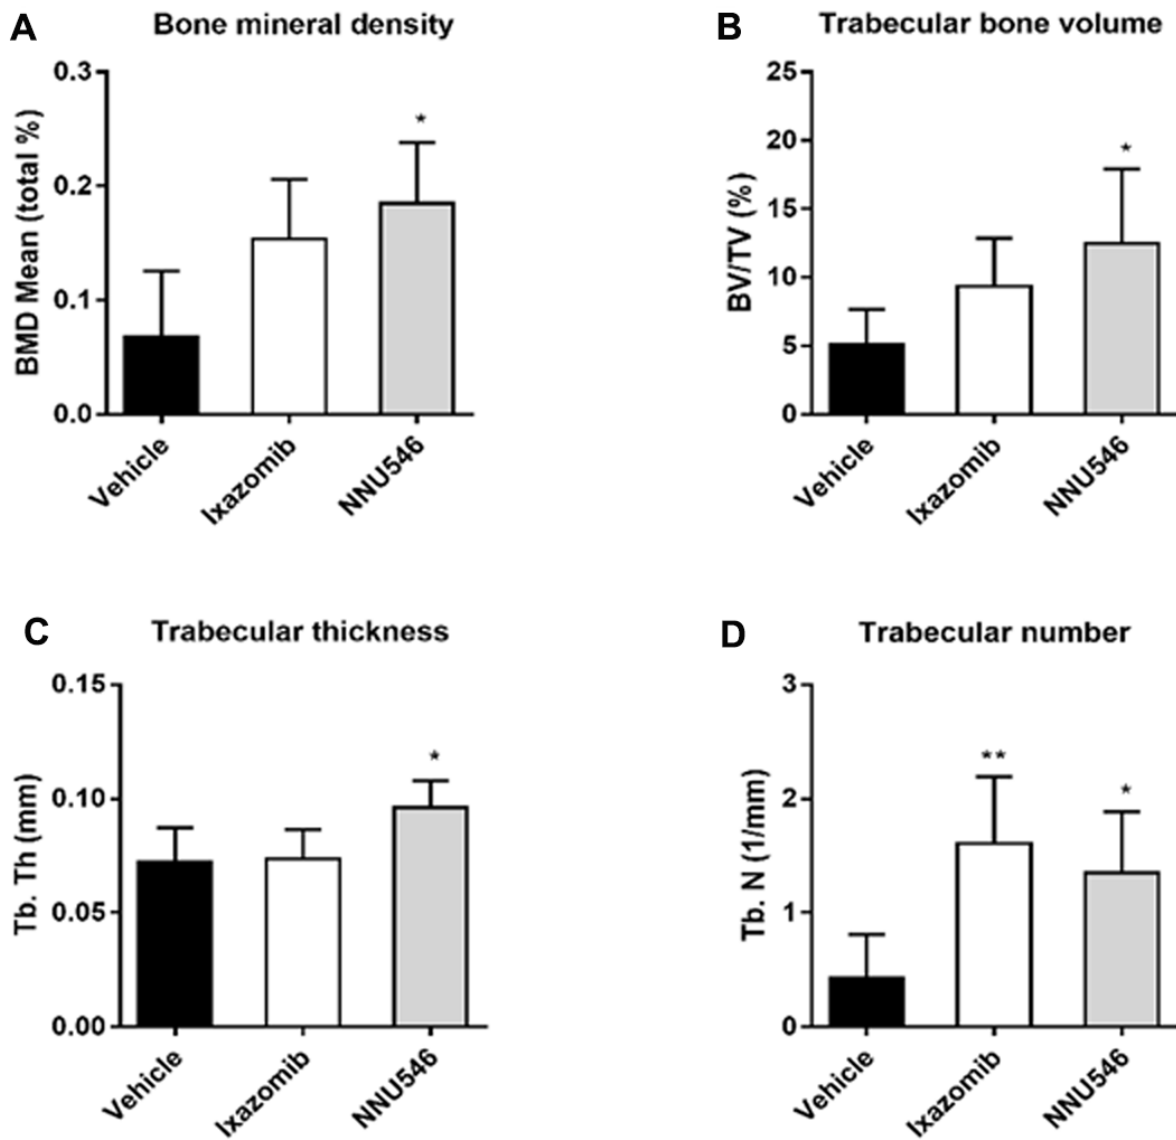

**Supplementary Figure 4. NNU546 promoted bone formation in myelomatous bones.** SCID-rab mice engrafted with myeloma cells of MM patients were treated with vehicle, ixazomib (5 mg/kg, BIW) or NNU546 (1 mg/kg, QD). Levels of BMD (A) and static histomorphometry (B–D) of the implanted bones at the end of experiment. Data were presented as mean  $\pm$  SD (n=5; \*,  $p < 0.05$ ; \*\*,  $p < 0.01$ ). Y-axis abbreviation: BMD, bone mineral density; BV, bone volume; TV, tissue volume; Tb, trabecular; Th, thickness; N, number.
